# Supplementary material for: Comprehensive phenotyping reveals interactions and functions of Arabidopsis thaliana TCP genes in yield determination
Source: PubMed Central journal article supplement — Plant J. 2019 Apr 29;99(2):316–28. doi: 10.1111/tpj.14326 (PMC6767503; doi:10.1111/tpj.14326), 2019-04-29
Supplement: TPJ-99-316-s006.pdf [file TPJ-99-316-s006.pdf]

**Table S1** Mutant lines and measurement regime used in this study.

**a)**

|                 | Loci affected                                             | Mutant                               | Subdivision                                                                                  | T-DNA identifier                        | Mutant type      | Created/First described by            | Number in supplemental data |
|-----------------|-----------------------------------------------------------|--------------------------------------|----------------------------------------------------------------------------------------------|-----------------------------------------|------------------|---------------------------------------|-----------------------------|
| Class I<br>TCP  | AT1G69690                                                 | <i>tcp15</i>                         | TCP15-likes                                                                                  | SALK_011491                             | Loss-of-function | Alonso <i>et al.</i> , 2003           | 20                          |
|                 | AT3G47620 - AT1G69690                                     | <i>tcp14 tcp15</i>                   |                                                                                              | SALK_011491                             | Loss-of-function | Kieffer <i>et al.</i> , 2011          | 19                          |
|                 | AT1G58100 - AT1G69690                                     | <i>tcp8 tcp15</i>                    |                                                                                              | SAIL_656_F11 - SALK_011491              | Loss-of-function | In house                              | 6                           |
|                 | AT1G58100                                                 | <i>tcp8</i>                          | TCP20-associated                                                                             | SAIL-656-F11                            | Loss-of-function | Aguilar-Martinez <i>et al.</i> , 2013 | 10                          |
|                 | AT3G27010 - AT1G58100                                     | <i>tcp20 tcp8</i>                    |                                                                                              | SALK_041906 - SAIL_656_F11              | Loss-of-function | Danisman <i>et al.</i> , 2013         | 3                           |
|                 | AT2G45680                                                 | <i>tcp9</i>                          |                                                                                              | SALK_035853                             | Loss-of-function | Danisman <i>et al.</i> , 2012         | 2                           |
|                 | AT2G45680 - AT3G27010                                     | <i>tcp9 tcp20</i>                    |                                                                                              | SALK_035853 - SALK_041906               | Loss-of-function | Danisman <i>et al.</i> , 2012         | 1                           |
|                 | AT3G27010                                                 | <i>tcp20</i>                         |                                                                                              | SALK_041906                             | Loss-of-function | Danisman <i>et al.</i> , 2013         | 24                          |
|                 | AT5G51910 - AT3G27010                                     | <i>tcp19 tcp20</i>                   |                                                                                              | SALK_024434 - SALK_041906               | Loss-of-function | Danisman <i>et al.</i> , 2013         | 17                          |
|                 | AT3G27010 - AT1G72010                                     | <i>tcp20 tcp22</i>                   | TCP20-likes                                                                                  | SALK_041906 - SALK_045755               | Loss-of-function | In house                              | 18                          |
|                 | AT5G51910 - AT1G72010                                     | <i>tcp19 tcp22</i>                   |                                                                                              | SALK_024434 - SALK_045755               | Loss-of-function | In house                              | 16                          |
|                 | AT5G51910 - AT3G27010 - AT1G72010                         | <i>tcp19 tcp20 tcp22</i>             |                                                                                              | SALK_024434 - SALK_041906 - SALK_045755 | Loss-of-function | In house                              | 15                          |
|                 |                                                           |                                      |                                                                                              |                                         |                  |                                       |                             |
| Class II<br>TCP | AT5G60970                                                 | <i>tcp5</i>                          | TCP5-likes                                                                                   | SM_3_29639                              | Loss-of-function | Efroni <i>et al.</i> , 2008           | 22                          |
|                 | AT5G60970 - AT3G02150 - AT5G08070                         | <i>tcp5 tcp13 tcp17</i>              |                                                                                              | SM_3_29639 - SM_3_23151 - SALK_147288   | Loss-of-function | Efroni <i>et al.</i> , 2008           | 11                          |
|                 | AT5G60970 - AT3G02150 - AT5G08070                         | <i>miR-3TCP: tcp5, -13, -17</i>      |                                                                                              | Artificial miRNA overexpression         | Loss-of-function | Efroni <i>et al.</i> , 2008           | 5                           |
|                 | AT5G60970                                                 | <i>pATML1:TCP5</i>                   |                                                                                              | Overexpression of TCP5 in epidermis     | Gain-of-function | Van Es <i>et al.</i> , 2018           | 13                          |
|                 | AT3G02150                                                 | <i>pATML1:TCP13</i>                  |                                                                                              | Overexpression of TCP13 in epidermis    | Gain-of-function | In house                              | 12                          |
|                 | AT2G31070                                                 | <i>tcp10</i>                         | JAW-likes                                                                                    | SALK_137205                             | Loss-of-function | Alonso <i>et al.</i> , 2003           | 23                          |
|                 | AT4G18390 - AT1G53230 - AT3G15030 - AT2G31070 - AT1G30210 | <i>jaw-D: tcp2, -3, -4, -10, -24</i> | CYC (BRANCHE D-likes)                                                                        | Overexpression of miR319                | Loss-of-function | Palatnik <i>et al.</i> , 2003         | 14                          |
|                 | AT3G18550                                                 | <i>brc1/tcp18</i>                    |                                                                                              | SALK_091920                             | Loss-of-function | Aguilar-Martinez <i>et al.</i> , 2007 | 21                          |
|                 | AT1G68800                                                 | <i>brc2/tcp12</i>                    |                                                                                              | SALK_023116                             | Loss-of-function | Aguilar-Martinez <i>et al.</i> , 2007 | 7                           |
|                 | AT1G68800 - AT3G18550                                     | <i>brc1brc2</i>                      |                                                                                              | SALK_091920 - SALK_023116               | Loss-of-function | Aguilar-Martinez <i>et al.</i> , 2007 | 4                           |
| Control lines   | Colo "WUR"                                                |                                      | Wild type background for gain-of-function mutants <i>pATML1:TCP5</i> and <i>pATML1:TCP13</i> |                                         |                  |                                       | 8                           |
|                 | Colo "NASC"                                               |                                      | Wild type background for loss-of-function mutants, T-DNA and artificial miRNA                |                                         |                  |                                       | 9                           |

**b)**

**Growing and measurement scheme**

|      |             |       |             |       |     |
|------|-------------|-------|-------------|-------|-----|
| 0:00 |             | 8:00  | P<br>A<br>M | 16:00 |     |
| 0:30 |             | 8:30  |             | 16:30 | NIR |
| 1:00 |             | 9:00  | N<br>I<br>R | 17:00 | PAM |
| 1:30 | N<br>I<br>R | 9:30  |             | 17:30 |     |
| 2:00 |             | 10:00 |             | 18:00 |     |
| 2:30 |             | 10:30 |             | 18:30 |     |
| 3:00 |             | 11:00 | P<br>A<br>M | 19:00 |     |
| 3:30 |             | 11:30 |             | 19:30 |     |
| 4:00 |             | 12:00 |             | 20:00 |     |
| 4:30 | P<br>A<br>M | 12:30 |             | 20:30 |     |
| 5:00 |             | 13:00 | N<br>I<br>R | 21:00 | NIR |
| 5:30 |             | 13:30 |             | 21:30 |     |
| 6:00 |             | 14:00 |             | 22:00 |     |
| 6:30 |             | 14:30 |             | 22:30 |     |
| 7:00 |             | 15:00 | P<br>A<br>M | 23:00 | NIR |
| 7:30 |             | 15:30 |             | 23:30 |     |

(a) Mutant and overexpression lines and wild type controls used in this study. Shown are the affected loci, mutant name, division in sub-groups for analyses, the T-DNA or construct identifier, the type of mutant, and reference to the paper in which the lines were initially described. The number in the column on the right is a unique identifier, which is used as reference in all graphs. (b) Shows how the measurements were scheduled during each 24 hr cycle in the rosette stage. Day time is depicted in yellow and night time in grey. Measurements include near infrared reflectance (NIR) and pulse-amplitude-modulation (PAM), as measure for  $\Phi$ PSII.
